# Supplementary material for: Comparative metagenomics reveals the microbial diversity and metabolic potentials in the sediments and surrounding seawaters of Qinhuangdao mariculture area
Source: PubMed Central journal article supplement (PMC7272022; doi:10.1371/journal.pone.0234128), 2020-06-04
Supplement: pone.0234128.s006.pdf [file pone.0234128.s006.pdf]

| <b>KO_Pathway_Level1</b>             | <b>S1S</b> | <b>S2S</b> | <b>S1</b> | <b>S2</b> | <b>Total</b> |
|--------------------------------------|------------|------------|-----------|-----------|--------------|
|                                      | (%)        | (%)        | (%)       | (%)       | (%)          |
| Cellular processes                   | 2.53       | 2.62       | 2.79      | 2.80      | 2.69         |
| Environmental Information Processing | 3.35       | 3.37       | 3.62      | 3.42      | 3.44         |
| Genetic Information Processing       | 5.74       | 5.27       | 4.54      | 4.27      | 4.96         |
| Human Diseases                       | 1.90       | 1.85       | 1.75      | 1.69      | 1.80         |
| Metabolism                           | 18.69      | 17.92      | 17.06     | 16.33     | 17.50        |
| Organismal Systems                   | 1.02       | 1.01       | 1.14      | 1.21      | 1.09         |
| Others                               | 66.76      | 67.97      | 69.09     | 70.28     | 68.52        |
