# Supplementary material for: Comparative metagenomics reveals the microbial diversity and metabolic potentials in the sediments and surrounding seawaters of Qinhuangdao mariculture area
Source: PubMed Central journal article supplement (PMC7272022; doi:10.1371/journal.pone.0234128), 2020-06-04
Supplement: pone.0234128.s007.pdf [file pone.0234128.s007.pdf]

---

| <b>Genes</b> | <b>sediments</b> | <b>seawaters</b> | <b>Description</b>                                             |
|--------------|------------------|------------------|----------------------------------------------------------------|
| <i>czcA</i>  | 2955.927         | 2136.484         | cobalt-zinc-cadmium resistance protein CzcA                    |
| <i>czcB</i>  | 1018.055         | 916.0295         | membrane fusion protein, cobalt-zinc-cadmium efflux system     |
| <i>cadC</i>  | 600.2739         | 159.6633         | lead/cadmium/zinc/bismuth-responsive transcriptional repressor |
| <i>czcD</i>  | 2384.147         | 935.5844         | cobalt-zinc-cadmium efflux system protein                      |
| <i>zipB</i>  | 283.1985         | 928.4143         | zinc and cadmium transporter                                   |
| <i>cacC</i>  | 927.8136         | 629.2725         | outer membrane protein, cobalt-zinc-cadmium efflux system      |

---
